# Supplementary material
Source: PubMed Central journal article supplement (PMC8354006)
Supplement: NIHMS1618914-supplement-Supplemental_Material.pdf [file NIHMS1618914-supplement-Supplemental_Material.pdf]

## Supplementary Information for:

### Dense neuronal reconstruction through X-ray holographic nano-tomography

Aaron T. Kuan<sup>1,\*</sup>, Jasper S. Phelps<sup>1,2,\*</sup>, Logan A. Thomas<sup>1</sup>, Tri M. Nguyen<sup>1</sup>, Julie Han<sup>1</sup>, Chiao-Lin Chen<sup>3</sup>, Anthony W. Azevedo<sup>4</sup>, John C. Tuthill<sup>4</sup>, Jan Funke<sup>5</sup>, Peter Cloetens<sup>6</sup>, Alexandra Pacureanu<sup>1,6,§</sup>, Wei-Chung Allen Lee<sup>7,§</sup>

\* These authors contributed equally to this work.

§ Corresponding authors. Email to: [joitapac@esrf.eu](mailto:joitapac@esrf.eu), [wei-chung.lee@hms.harvard.edu](mailto:wei-chung.lee@hms.harvard.edu)

<sup>1</sup>Department of Neurobiology, Harvard Medical School, Boston, MA, USA

<sup>2</sup>Program in Neuroscience, Harvard University, Boston, MA, USA

<sup>3</sup>Department of Genetics, Harvard Medical School, Boston, MA, USA

<sup>4</sup>Department of Physiology and Biophysics, University of Washington, Seattle, Washington, 98195, USA

<sup>5</sup>HHMI Janelia Research Campus, Ashburn, VA, USA

<sup>6</sup>ESRF, The European Synchrotron, Grenoble, France

<sup>7</sup>F.M. Kirby Neurobiology Center, Boston Children's Hospital, Harvard Medical School, Boston, MA, USA

# Supplementary Data

## Supplementary Data Tables

| Sample                  | Voxel Size (nm) | Scan Edge Length ( $\mu\text{m}$ ) | Scan Edge Length, Ext FOV ( $\mu\text{m}$ ) | Sample Size ( $\mu\text{m}$ ) | Measured Resolution (nm) | Measured Resolution $\div$ Scan Voxel Size | Num. subvolumes for resolution measurement |
|-------------------------|-----------------|------------------------------------|---------------------------------------------|-------------------------------|--------------------------|--------------------------------------------|--------------------------------------------|
| mouse cortex            | 30              | 61                                 | 96                                          | 300 x 200 x 1000              | 87 [-4, +5]              | 2.9 [-0.1, +0.2]                           | 125                                        |
| mouse cortex            | 40              | 82                                 | 129                                         | 300 x 200 x 1000              | 131 [-5, +6]             | 3.3 [-0.1, +0.2]                           | 125                                        |
| mouse cortex            | 40              | 82                                 | 129                                         | 300 x 200 x 1000              | 134 [-3, +5]             | 3.3 [-0.1, +0.1]                           | 125                                        |
| <i>Drosophila</i> VNC   | 50              | 102                                | 161                                         | 200 x 200 x 600               | 139 [-5, +5]             | 2.8 [-0.1, +0.1]                           | 89                                         |
| <i>Drosophila</i> brain | 50              | 102                                | 161                                         | 300 x 200 x 700               | 174 [-11, +10]           | 3.5 [-0.2, +0.2]                           | 125                                        |
| <i>Drosophila</i> leg   | 60              | 122                                | 192                                         | 200 x 200 x 600               | 186 [-2, 14]             | 3.1 [-0.0, 0.2]                            | 110                                        |
| <i>Drosophila</i> leg   | 75              | 154                                | 241                                         | 400 x 600 x 800               | 198 [-8, +10]            | 2.6 [-0.1, +0.1]                           | 11                                         |
| <i>Drosophila</i> leg   | 80              | 164                                | 257                                         | 200 x 200 x 600               | 197 [-7, 17]             | 2.5 [-0.1, 0.2]                            | 116                                        |
| <i>Drosophila</i> leg   | 100             | 205                                | 322                                         | 200 x 200 x 600               | 215 [-7, 20]             | 2.1 [-0.1, 0.2]                            | 4                                          |
| <i>Drosophila</i> brain | 100             | 205                                | 322                                         | 300 x 200 x 700               | 222 [-9, +10]            | 2.2 [-0.1, +0.1]                           | 4                                          |
| <i>Drosophila</i> brain | 120             | 246                                | 386                                         | 300 x 200 x 700               | 183 [-8, +16]            | 1.5 [-0.1, +0.1]                           | 8                                          |

**Supplementary Data Table 1:** List of XNH scans included in resolution quantification (Figs. 1h, Extended Data Fig. 1b). “Ext FOV” refers to extended field of view reconstructions (see Methods). Resolutions are reported as median [interquartile range] of sampled subvolumes.

| Scan number | Contents                                               | Voxel Size (nm) |
|-------------|--------------------------------------------------------|-----------------|
| 1           | Overview of VNC T1s                                    | 160             |
| 2           | VNC, left T1                                           | 50              |
| 3           | Overview centered on VNC left T1 nerve and top of coxa | 160             |
| 4           | left T1 nerve and top of coxa                          | 75              |
| 5           | Middle of coxa                                         | 75              |
| 6           | Bottom of coxa and whole trochanter                    | 75              |
| 7           | Bottom of femur                                        | 75              |
| 8           | Lower-middle of femur                                  | 75              |
| 9           | Middle of femur                                        | 75              |
| 10          | Upper-middle of femur                                  | 75              |
| 11          | Femur-tibia joint                                      | 75              |
| 12          | Upper 2/3rds of tibia                                  | 100             |

**Supplementary Data Table 2:** List of XNH scans included in the *Drosophila* leg dataset (Fig. 3). Ten high-resolution scans (50-75 nm voxels) comprise the main dataset, while two overview scans (160 nm voxels) were used to enable accurate targeting of higher-resolution scans and to give extended anatomical context.

|                     | Receptor type            | Receptor location     | Cluster name     | # receptors in cluster                            | Comparison with previous literature                                                              | Nerve of entry into VNC      |
|---------------------|--------------------------|-----------------------|------------------|---------------------------------------------------|--------------------------------------------------------------------------------------------------|------------------------------|
| Surface structures  | Hair plates              | Thorax-coxa joint     | CoHP3            | 3                                                 | Consistent with <sup>1</sup>                                                                     | Dorsal                       |
|                     |                          |                       | CoHP4            | 4                                                 | Consistent with <sup>1</sup>                                                                     | Accessory                    |
|                     |                          |                       | CoHP8            | 8                                                 | Consistent with <sup>2</sup> but 2 more than in <sup>1</sup>                                     | Ventral                      |
|                     |                          | Coxa-trochanter joint | TrHP1            | 1                                                 | Consistent with <sup>2</sup> but not reported in <sup>1</sup>                                    | Main                         |
|                     |                          |                       | TrHP5            | 5                                                 | Consistent with <sup>1</sup>                                                                     | Main                         |
|                     |                          |                       | TrHP6            | 6                                                 | Consistent with <sup>1</sup>                                                                     | Main                         |
|                     |                          |                       | TrHP7            | 7                                                 | Consistent with <sup>1</sup>                                                                     | Main                         |
|                     |                          | Femur-tibia joint     | TiHP3            | 3                                                 | 2 more than reported in <sup>2</sup>                                                             | Main                         |
|                     |                          | Campaniform sensilla  | Trochanter       | TrCS3                                             | 3                                                                                                | Consistent with <sup>1</sup> |
|                     | TrCS5                    |                       |                  | 5                                                 | Consistent with <sup>1</sup>                                                                     | Main                         |
|                     | TrCS8                    |                       |                  | 8                                                 | Consistent with <sup>1</sup>                                                                     | Main                         |
|                     | Femur                    |                       | FeCS1            | 1                                                 | Consistent with <sup>1</sup>                                                                     | Main                         |
|                     |                          |                       | FeCS11           | 11                                                | Consistent with <sup>1</sup>                                                                     | Main                         |
|                     | Tibia                    |                       | TiCSd2           | 2                                                 | Consistent with <sup>1</sup>                                                                     | Main                         |
|                     |                          |                       | TiCSv1           | 1                                                 | Consistent with <sup>1</sup>                                                                     | Main                         |
|                     |                          | TiCSv2                | 2                | Consistent with <sup>1</sup>                      | Main                                                                                             |                              |
|                     | Bristles                 | Coxa                  | N/A <sup>†</sup> | 13                                                | Qualitatively similar to previous reports. Total numbers could not be found in previous reports. | Unresolved                   |
|                     |                          | Trochanter            | N/A <sup>†</sup> | 10                                                |                                                                                                  | Main                         |
|                     |                          | Femur                 | N/A <sup>†</sup> | 113                                               |                                                                                                  | Main                         |
|                     |                          | Tibia                 | N/A <sup>†</sup> | 97*                                               |                                                                                                  | Main                         |
| Internal structures | Chordotonal scolopidia   | Femur                 | FeCO             | 76 (152 neurons <sup>‡</sup> )                    | More than range of 100-138 neurons reported in <sup>3</sup>                                      | Main                         |
|                     | Stretch receptor neurons | Coxa                  | N/A <sup>†</sup> | 1                                                 | Not labeled in <sup>4</sup>                                                                      | Ventral                      |
|                     |                          | Femur                 | N/A <sup>†</sup> | 1                                                 | Consistent with <sup>4</sup>                                                                     | Main                         |
| Strand receptors    | Coxa                     | N/A <sup>†</sup>      | 1                | Only reported in orthopteran insects <sup>5</sup> | Accessory                                                                                        |                              |

**Supplementary Data Table 3:** Sensory receptors identified in an XNH dataset of a *Drosophila* front leg (Figs. 3, Extended Data Fig. 3). Gray cells contain information that modifies or extends reports from previous literature. For nerves of entry, “Main” refers to the prothoracic leg nerve; “Dorsal” refers to the dorsal prothoracic nerve; “Ventral” refers to the ventral prothoracic nerve; “Accessory” refers to the prothoracic accessory nerve<sup>5</sup>. \*Excludes bristles on the bottom half of the tibia, which was not imaged. <sup>†</sup>Bristles, stretch receptors, and strand receptors are not organized into clusters. Reported numbers are total counts per leg segment. <sup>‡</sup>We find that each scolopidium of the femoral chordotonal organ has the dendrites of two sensory neurons associated with it.

## Descriptions of Supplementary Videos

**Supplementary Video 1:** An XNH scan of an adult *Drosophila* brain at a voxel size of 120 nm and a measured resolution of 183 nm. At this resolution, many individual neurons can be tracked as they travel between different brain regions. The field of view encompasses the entire central brain and part of both optic lobes, allowing brain-wide projections to be mapped.

**Supplementary Video 2:** An XNH scan of mouse somatosensory cortex (layer 5) at a voxel size of 30 nm and a measured resolution of 87 nm. At this resolution, all myelinated axons and most unmyelinated axons and dendrites are resolved. Many subcellular features, most notably mitochondria and endoplasmic reticulum, are resolved.

**Supplementary Video 3:** An XNH scan of the adult *Drosophila* VNC, encompassing the T1 neuromere that controls movements of a front leg. This single scan at 50 nm voxels captures the majority of the T1 neuromere with sufficient resolution (139 nm) to reconstruct single neurons and identify different types of sensory and motor neurons (see Fig. 4). Body wall muscles surrounding the neuromere, as well as the motor neurons innervating those muscles, are also visible.

**Supplementary Video 4:** An XNH scan of part of the adult *Drosophila* leg at a voxel size of 75 nm and a measured resolution of 198 nm. The inset shows a zoom-in on the leg nerve, which contains motor neurons (large diameter axons) traveling out to muscles, as well as sensory neurons (variable diameter depending on type, see Fig. S3) bringing mechanosensory information to the central nervous system. The structural arrangement of muscles, fats, and tendons, and joints are visible (see Fig. 3).

**Supplementary Video 5:** Automated segmentation of a portion of the adult *Drosophila* VNC encompassing the T1 neuropil (same data as Supplementary Video 3 and Fig. 4). Each neuron is rendered in a color corresponding to neuron types determined based on 3D morphology (as in Fig. 4c). Blue: motor neurons; Orange: campaniform sensillum neurons; Purple: hair plate neurons; Red: chordotonal organ neurons; Green: bristle neurons.

**Supplementary Video 6:** An XNH scan at 105 nm voxel size of an adult *Drosophila* brain prepared without any heavy metal staining. Phase-contrast imaging enables this type of soft tissue to be imaged with reasonable contrast. As with stained samples (Videos 1-4), many individual neurons can be reconstructed traveling within and between brain regions.

## Supplementary References

1. Merritt, D. J. & Murphey, R. K. Projections of leg proprioceptors within the CNS of the fly *Phormia* in relation to the generalized insect ganglion. *J. Comp. Neurol.* **322**, 16–34 (1992).
2. Hodgkin, H. M. & Bryant, P. J. Scanning electron microscopy of the adult of *Drosophila melanogaster*. *Genet. Biol. Drosoph.* (1979).
3. Mamiya, A., Gurung, P. & Tuthill, J. C. Neural Coding of Leg Proprioception in *Drosophila*. *Neuron* **100**, 636-650.e6 (2018).
4. Desai, B. S., Chadha, A. & Cook, B. The *stum* gene is essential for mechanical sensing in proprioceptive neurons. *Science* (80-. ). **343**, 1256–1259 (2014).
5. Bräunig, P. Strand receptors with central cell bodies in the proximal leg joints of orthopterous insects. *Cell Tissue Res.* **222**, 647–654 (1982).
6. Court, R. C. *et al.* A Systematic Nomenclature for the *Drosophila* Ventral Nerve Cord. *Neuron* (in press).
